# Supplementary material
Source: PubMed Central journal article supplement (PMC2577565)
Supplement: NIHMS50038-supplement.pdf [file NIHMS50038-supplement.pdf]

1 rest exhibited only subthreshold fluctuations. An 8 by 8 grid of electrodes was  
2 included, 60 of these (except corner electrodes 11, 18, 81 and 88) were used for  
3 recording and stimulation as in a real MEA (figure 1(d)). A stimulation electrode  
4 stimulated  $76 \pm 12$  ( $n= 5$  simulated networks) of the closest model neurons.

5

#### 6 **Setup of network initial states:**

7 All excitatory synaptic weights were initially set to 0.25 and could vary between  
8 zero and 0.5 due to STDP. At the maximal weight, each spike would have a 90%  
9 probability of evoking a spike in the post-synaptic neuron, due to its summation  
10 with intrinsic noise. The synaptic weights for the inhibitory connections were fixed  
11 at -0.25. The networks were run for 5 hours in simulated time until the synaptic  
12 weights reached a steady state. Most of the excitatory synaptic weights ( $92 \pm 3\%$ )  
13 in the 5 reference networks were less than 0.05 or greater than 0.45. This bimodal  
14 steady-state distribution of weights arose from the STDP rule, as previously  
15 observed by Song et al.(Song et al., 2000), and Izhikevich and Desai (Izhikevich  
16 and Desai, 2003). The set of synaptic weights after 5 hours of spontaneous activity  
17 stabilized, without external stimuli, and was used as the initial state for the  
18 corresponding reference network.

19

20

21

## 1 **S2: Calculations of the statistics for experiments in simulations and** 2 **living cultures.**

3 The evoked responses within 100 msec (to include all evoked responses) after the  
4 stimuli of random probing sequences (RPSs) were used for calculations of the  
5 statistics. The dimensionalities of different statistics are shown in Table S1. For those  
6 statistics include temporal information (FRH, MI, SCCC, JPSTH, and CAT),  
7 responses within 100 msec were binned by a 5 msec moving time bin with 500  $\mu$ sec  
8 time step. 500  $\mu$ sec time step was used to obtain fine temporal resolution, since it was  
9 less than the occurrence of an action potential. 5 msec bin size was used to acquire  
10 action potentials on multiple electrodes within a single bin. Also, the same binning  
11 parameters were used for all statistics in simulations and in living cultures for fair  
12 comparison of their performance.

13

### 14 **1. Simulations:**

#### 15 *Firing Rate (FR)*

16 This most commonly used statistic quantifies the intensity of the evoked  
17 responses. During each simulation, stimuli at each electrode occurred multiple  
18 times ( $10.0 \pm 3.1$  trials) in one RPS. FR for evoked responses to each stimulation  
19 electrode was calculated by averaging the number of spikes counted at each  
20 recording electrode over trials, producing a 60-dimensional vector.

21

#### 22 *Firing Rate Histogram (FRH)*

23 FRH expands on FR by including temporal information. FRH from recording  
24 electrode  $E_k$  to the probing stimulus at electrode  $P_i$ ,  $FRH_{E_k}^{P_i}$ , was the average  
25 number of spikes counted in a 5 msec moving time window with 500  $\mu$ sec time

1 step over trials, which resulted in a 1X191 vector. FRH for evoked responses to  
 2 stimulation electrode  $P_i$  was defined by joining  $FRH_{E_k}^{P_i}$  from 60 recording  
 3 electrodes together, which formed an 11,460-dimensional (191X60) vector.

#### 4 *Center of Activity Trajectory (CAT)*

5 The definition of CAT is described in Methods (Equation 1 and 2). The X and Y  
 6 components are both 1X191 vectors. By appending two components together,  
 7 CAT for evoked responses to each stimulation electrode was a 382-dimensional  
 8 (191X2) vector.

#### 9 *Mutual Information (MI)*

10 MI quantifies the statistical dependence, including higher order moments in  
 11 addition to 2<sup>nd</sup> order, between responses at different locations (Moddemeijer,  
 12 1989; Brunel and Nadal, 1998; Paninski, 2003). MI between two recording  
 13 electrodes  $E_k$  and  $E_j$  for stimulation electrode  $P_i$  is defined as the mutual  
 14 information between two distributions:  $FRH_{E_k}^{P_i}$  and  $FRH_{E_j}^{P_i}$ . Let  $FRH_{E_k}^{P_i} =$

15  $\{A_n\}_{n=1}^{191}$  and  $FRH_{E_j}^{P_i} = \{B_m\}_{m=1}^{191}$ , where  $A_n$  and  $B_m$  represent elements in FRHs.

16 Then the MI between  $FRH_{E_k}^{P_i}$  and  $FRH_{E_j}^{P_i}$  is defined as:

$$17 \quad I(FRH_{E_k}^{P_i}, FRH_{E_j}^{P_i}) = \sum_{n,m} P_{X,Y}(A_n \times B_m) \ln \frac{P_{X,Y}(A_n \times B_m)}{P_X(A_n) \times P_Y(B_m)}$$

18 where  $P_X$  and  $P_Y$  represent the marginal probabilities of  $FRH_{E_k}^{P_i}$  and  $FRH_{E_j}^{P_i}$ , and

19  $P_{X,Y}$  represents the joint probability of  $FRH_{E_k}^{P_i}$  and  $FRH_{E_j}^{P_i}$ . MI was estimated by

20 using the histogram-based mutual information methods described by

21 Moddemeijer (Moddemeijer, 1989). In this study, the MATLAB codes from

1 Rudy Moddemeijer's group were used<sup>1</sup>. MI provides a non-directional  
2 connectivity map, which represents the dependence between activities at  
3 different pairs of electrodes. By joining the MI from every pair of electrodes, MI  
4 for evoked responses to each stimulation electrode was a 1,770-dimensional  
5 (60X59/2) vector.

6

### 7 *Shift-predictor Corrected Cross-Correlogram (SCCC)*

8 The corrected cross-correlogram (Michalski et al., 1983; Eggermont, 1992;  
9 Brody, 1999; Franco et al., 2004; Ventura et al., 2005) removes the peak in the  
10 original cross-correlogram that is due to co-stimulation of the neurons, and  
11 measures the association between neurons. For each pair of recording electrodes,  
12 the “raw” cross-correlogram was constructed by averaging the  
13 cross-correlograms between two spike trains from the two electrodes over trials.  
14 The “shift predictor” was constructed by averaging the cross-correlograms  
15 between all possible pairs of spike trains from the two electrodes but from  
16 different trials. SCCC was then the raw cross-correlogram minus the shift  
17 predictor. In this study, the algorithm described by George Gerstein's group was  
18 used<sup>2</sup>.

19

20 With the same binning resolution used for FRH, SCCC between each pair of  
21 recording electrodes was a (191X2-1)-dimensional vector which represents the  
22 correlations sequence at different lags. Therefore, SCCC for evoked responses to  
23 each stimulation electrode was a 674,370-dimensional ((191X2-1)X60X59/2)  
24 vector.

---

<sup>1</sup><http://www.cs.rug.nl/~rudy/papers/abstracts/RM8902.html>

<sup>2</sup><http://mulab.physiol.upenn.edu/crosscorrelation.html>

1

2 *Joint Peri-Stimulus Time Histogram (JPSTH)*

3 The JPSTH quantifies the causality between responses at different locations  
4 (Gerstein and Perkel, 1969; Aertsen et al., 1989; Ventura et al., 2005). JPSTH  
5 finds the fixed delay between sequences of spikes recorded at different pairs of  
6 neurons (electrodes) over multiple trials, which can depict causal relationships  
7 between them. Similar to SCCC, the shift-predictor was applied on the “raw”  
8 JPSTH to eliminate the time-locked stimulus-induced covariation due to  
9 co-stimulation. In this study, the algorithm and MATLAB codes from George  
10 Gerstein’s group were used<sup>3</sup>. The results can provide directional information  
11 about the connectivity. With the same binning resolution used for FRH, JPSTH  
12 between each pair of recording electrodes was 191X191-dimensional. Therefore,  
13 JPSTH for evoked responses to each stimulation electrode was a  
14 64,571,370-dimensional (191X191X60X59/2) vector.

15

16 *Center of Activity Trajectory with Electrode Locations Shuffled (CAT-ELS)*

17 The electrode locations,  $E_k$ , were randomly shuffled. Then CAT-ELS was  
18 calculated according to Equation 1 and 2 (in Methods) by using these shuffled  
19 electrode locations. For each network, the electrode locations were shuffled 10  
20 times and 10 different corresponding CAT-ELSs were generated.

21

22

23 **2. Experiments in living cultures:**24 *Firing Rate (FR)*

25 The number of spikes was counted at each recording electrode for each probe  
26 response and averaged every block. Thus, for each stimulation electrode, a

---

<sup>3</sup> <http://mulab.physiol.upenn.edu/jpst.html>

1 60-dimensional FR vector was obtained for every 240 sec (“block”, see  
2 Methods).

3

#### 4 *Firing Rate Histogram (FRH)*

5 For evoked responses to each stimulus, the FRH was calculated by using a 5  
6 msec moving time window with time step of 500  $\mu$ sec. Thus, for each  
7 stimulation electrode, an 11,460-dimensional (191X60) FRH vector was obtained  
8 for every block.

9

#### 10 *Center of Activity Trajectory (CAT)*

11 Let  $FRH_{E_k}^{P_i}$  be the average responses over each block, recorded at electrode  $E_i$  to  
12 stimulation electrode  $P_i$ . CAT for stimulation electrode  $P_i$  was then calculated  
13 from the  $FRH_{E_k}^{P_i}$  by using Equation 1 and 2 (in Methods). Thus, for each  
14 stimulation electrode, a 382-dimensional (191X2) CAT vector was obtained for  
15 every block.

16

#### 17 *Shift-predictor Corrected Cross-Correlogram (SCCC)*

18 With the same binning resolution used for FRH, SCCC between each pair of  
19 recording electrodes was calculated for every block. Thus, for each stimulation  
20 electrode, a 674,370-dimensional ((191X2-1)X60X59/2) SCCC vector was  
21 obtained for every block.

22

#### 23 *Center of Activity Trajectory with Electrode Locations Shuffled (CAT-ELS)*

24 CAT-ELS was calculated by the same shuffling procedure used in simulations.

25 For each experiment, the electrode locations were shuffled 10 times and 10

1 different corresponding CAT-ELs were generated. The dimensionality of  
 2 CAT-ELs was the same as CAT.

3

4 **Table S1. The dimensionality of the statistics.**

| Statistics     | Dimensionality <sup>1</sup> |                                |
|----------------|-----------------------------|--------------------------------|
|                | Simulations                 | Experiments in living cultures |
| <i>FR</i>      | 60                          | 60                             |
| <i>FRH</i>     | 11,460                      | 11,460                         |
| <i>MI</i>      | 1,770                       | -                              |
| <i>CAT</i>     | 382                         | 382                            |
| <i>CAT_ELS</i> | 382                         | 382                            |
| <i>SCCC</i>    | 674,370                     | 674,370                        |
| <i>JPSTH</i>   | 64,571,370                  | -                              |

5 <sup>1</sup> The dimensionality is defined as the length of the statistic calculated from evoked  
 6 responses to *one* stimulation electrode in one simulation or in one block (for  
 7 experiments in living cultures).

8



1 **S3: Movie of CATs in a simulated network.**

2 Different patterns of CATs were obtained from evoked responses to stimuli at  
3 different electrodes in simulation (see **Movie S3**). **A.** The rasterplot of 1 second of  
4 network activity from 1000 LIF neurons. Evoked responses to stimuli at different  
5 electrodes are shown in different colors. **B.** 1000 neurons on 3mm by 3mm area.  
6 Neurons are shown as gray dots, and the active synapses are shown in cyan lines. The  
7 locations of stimulation electrodes are indicated by crosses with the corresponding  
8 colors shown in A. **C.** The corresponding CATs. The color of the trajectory represents  
9 the corresponding evoked response shown in A. Time is represented in the red bar at  
10 the bottom of A.

11

1 **S4: Performances of the 6 statistics after spike sorting in simulated**  
 2 **networks.**

3 Sorting recorded action potentials and recalculating the activity statistics improved the  
 4 performance of all except for CAT. However, the CAT still showed the highest  
 5 performance. The calculation of the CAT remained the same as the sorted spikes are  
 6 spatially summed according to recording electrode locations The six statistics were  
 7 re-calculated based on the activity of about 250 spike sorted neurons instead of 60  
 8 electrodes (see Results).JPSTH, SCCC, FRH, MI and FR improved 11.1, 17.6, 11.0,  
 9 35.0 and 31.2 %, respectively. The same figure representation was used as in Figure 7.  
 10 The sensitivities and specificities for these statistics (also see Discussion) are shown  
 11 in the table.

12

| Statistic       | <i>CAT</i> | <i>JPSTH</i> | <i>SCCC</i> | <i>FRH</i> | <i>MI</i> | <i>FR</i> |
|-----------------|------------|--------------|-------------|------------|-----------|-----------|
| Sensitivity (%) | 88.7       | 85.4         | 82.8        | 60.2       | 65.0      | 51.2      |
| Specificity (%) | 82.4       | 77.9         | 77.9        | 85.3       | 95.6      | 100       |

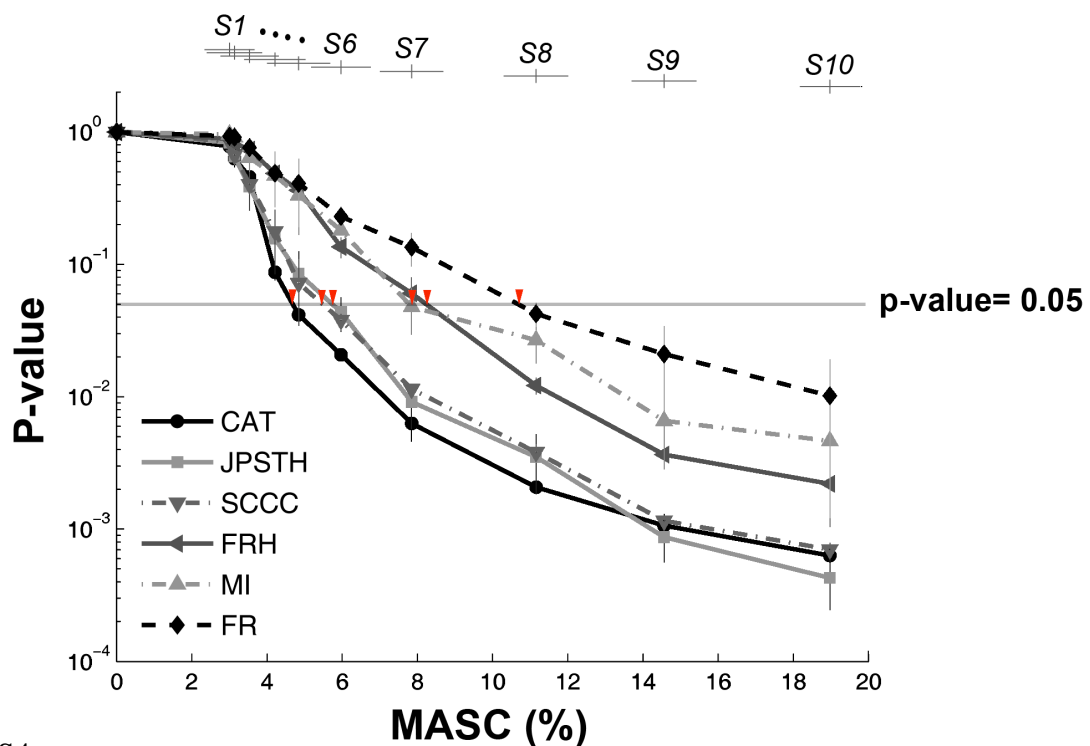

Figure S4

1 **S5: Movies of CATs in a MEA culture: before and after tetanization.**

2 Different patterns of CATs were obtained from evoked responses to different probe  
3 electrodes in MEA cultures. Also, CATs from the same probe electrode were found  
4 different before and after tetanization (shown **Movie S5a** and **Movie S5b**,  
5 respectively). **A.** The rasterplot of 10 seconds of network activity at 60 electrodes.  
6 Evoked responses to different probe electrodes are shown in different colors (the same  
7 color was used for the same probe electrode in 2 movies). **B.** Activity distribution in  
8 60-channel MEA. Activity intensity at different electrodes is shown by black filled  
9 circles with different sizes. The locations of probe electrodes are indicated by crosses  
10 with the corresponding colors shown in A. **C.** The corresponding CATs. The color of  
11 the trajectory represents the corresponding evoked response shown in A. The scales in  
12 the 2 movies are the same. Time is represented in the red bar at the bottom of A.

13

14

15

16

1 **S6: CATs in all experiments in MEA cultures: before and after**  
2 **tetanization.**

3 Different patterns of CATs were obtained before and after tetanization from 6  
4 experiments in MEAs (see figure). CATs obtained before tetanization (*Pre*) and after  
5 tetanization (*Post*) for each probe electrode are shown. The column-row numbers of  
6 corresponding probe electrodes are shown in the 8 by 8 MEA grids shown in the  
7 middle. The tetanization electrodes are depicted by thick black circles. For each probe,  
8 CATs calculated for each “block” (see Methods) are shown in black lines and overlaid.  
9 The averaged CATs are shown in colored circles (from blue to red).

10



**1 S7: Calculation of center of weights (CW) for simulations.**

2 Plastic changes in the simulated networks' functional architecture can be represented  
3 by the trajectory of the center of weights (CW). Let  $W_i(t)$  be the weight of synapse  $i$  at  
4 time  $t$ . Let  $X_i$  and  $Y_i$  indicate the horizontal and vertical distances from the  
5 post-synaptic neuron of the synapse  $i$  to a reference point (the center of the dish was  
6 used). Then, CW of time  $t$  is a two dimensional vector:

$$7 \quad \vec{CW}(t) = \frac{\sum_{i=1}^N W_i(t) \cdot [X_i, Y_i]}{\sum_{i=1}^N W_i(t)}$$

8 where  $N$  is the total number of excitatory synapses. Note that while CAT describes the  
9 spatiotemporal patterns of signal propagation, CW shows the dynamics of connection  
10 strengths.

11

12

13

14

15

## 1 **References**

- 2 Aertsen AM, Gerstein GL, Habib MK, Palm G (1989) Dynamics of neuronal firing  
3 correlation: modulation of "effective connectivity". *J Neurophysiol*  
4 61:900-917.
- 5 Brody CD (1999) Correlations Without Synchrony. *Neural Computation*  
6 11:1537-1551.
- 7 Brunel N, Nadal J-P (1998) Mutual Information, Fisher Information, and Population  
8 Coding. *Neural Computation* 10:1731-1757.
- 9 Chao ZC, Bakkum DJ, Wagenaar DA, Potter SM (2005) Effects of random external  
10 background stimulation on network synaptic stability after tetanization—A  
11 modeling study. *Neuroinformatics* 3:263-280.
- 12 Eggermont J (1992) Neural interaction in cat primary auditory cortex. Dependence on  
13 recording depth, electrode separation, and age. *J Neurophysiol*  
14 68:1216-1228.
- 15 Franco L, Rolls ET, Aggelopoulos NC, Treves A (2004) The use of decoding to  
16 analyze the contribution to the information of the correlations between the  
17 firing of simultaneously recorded neurons. *Exp Brain Res* 155:370-384.
- 18 Gerstein G, Perkel D (1969) Simultaneously recorded trains of action potentials:  
19 analysis and functional interpretation. *Science* 164:828-830.
- 20 Izhikevich EM, Desai NS (2003) Relating STDP to BCM. *Neural Computation*  
21 15:1511-1523.
- 22 Izhikevich EM, Gally JA, Edelman GM (2004) Spike-Timing Dynamics of Neuronal  
23 Groups  
24 *Cerebral Cortex* 14:933-944.
- 25 Kawaguchi H, Fukunishi K (1998) Dendrite classification in rat hippocampal neurons  
26 according to signal propagation properties - Observation by multichannel  
27 optical recording in cultured neuronal networks. *Experimental Brain Research*  
28 122:378-392.
- 29 Latham PE, Richmond BJ, Nirenberg S, Nelson PG (2000) Intrinsic dynamics in  
30 neuronal networks. II. Experiment. *Journal of Neurophysiology* 83:828-835.
- 31 Markram H, Gupta A, Uziel A, Wang Y, Tsodyks M (1998) Information processing  
32 with frequency-dependent synaptic connections. *Neurobiology of Learning*  
33 *and Memory* 70:101-112.
- 34 Marom S, Shahaf G (2002) Development, learning and memory in large random  
35 networks of cortical neurons: Lessons beyond anatomy. *Quarterly Reviews of*  
36 *Biophysics* 35:63-87.
- 37 Michalski A, Gerstein GL, Czarkowska J, Tarnecki R (1983) Interactions between cat  
38 striate cortex neurons. *Experimental Brain Research* 51:97 - 107.

- 1 Moddemeijer R (1989) On Estimation of Entropy and Mutual Information of
- 2 Continuous Distributions. *Signal Processing* 16:233-246.
- 3 Natschlager T, Markram H, Maass W (2002) Computer models and analysis tools for
- 4 neural microcircuits. In: *A Practical Guide to Neuroscience Databases and*
- 5 *Associated Tools*.
- 6 Paninski L (2003) Estimation of Entropy and Mutual Information. *Neural*
- 7 *Computation* 15:1191-1253.
- 8 Segev R, Ben-Jacob E (2000) Generic modeling of chemotactic based self-wiring of
- 9 neural networks. *Neural Networks* 13:185-199.
- 10 Song S, Miller KD, Abbott LF (2000) Competitive hebbian learning through
- 11 spike-timing-dependent synaptic plasticity. *Nature Neuroscience* 3:919-926.
- 12 Ventura Vr, Cai C, Kass RE (2005) Trial-to-Trial Variability and Its Effect on
- 13 Time-Varying Dependency Between Two Neurons. *J Neurophysiol*
- 14 94:2928-2939.
- 15
- 16
